# Supplementary material for: Slechter cognitief presteren bij ouderen met kleine cerebrale bloedingen [Poorer cognitive performance in elderly suffering from cerebral microbleeds]
Source: Royal Society of Chemistry journal article supplement (doi:10.1039/b708967h), 2012-01-01
Supplement: b708967h.pdf [file b708967h.pdf]

## One-pot synthesis of benzothiazolines and naphthathiazolines via cascade *ortho*-lithiation, cyclisation and elimination of N-arylsulfonyl lactams

John. D. Harling,<sup>†</sup> Patrick. G. Steel,<sup>\*‡</sup> Tom. M. Woods<sup>‡</sup> and Dmitry S. Yufit.<sup>‡</sup>

Department of Chemistry, University of Durham, Science Laboratories, South Road  
Durham, DH1 3LE, UK and GlaxoSmithKline, Gunnels Wood Road, Stevenage,  
Herts. SG1 2NY, UK

[p.g.steel@durham.ac.uk](mailto:p.g.steel@durham.ac.uk)

‡ Durham University. † GlaxoSmithKline.

### General method for N-alkylsulfonyl protection of lactams.

To a cold (0 °C) solution of lactam (0.34 M, 1.0 eq) in dry THF was added a solution of *n*-BuLi (1.6 M, 1.1 eq) via a syringe and the reaction mixture was stirred at 0 °C for 1 h (white precipitate (salt) forms). To this was added a cold (0 °C) solution of arylsulfonyl chloride (1.0 M, 1.3 eq) in dry THF via cannula. The reaction mixture was stirred at 0 °C and followed by TLC or LCMS until all the starting material was consumed. The reaction was warmed to room temperature and concentrated in vacuo, the crude material was taken into DCM, washed with water (3x), dried over MgSO<sub>4</sub> and concentrated under reduced pressure.

*N*-[(4'-methylphenyl)sulfonyl]pyrrolidin-2-one **4b**

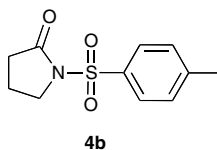

Crude material collected as a pale brown/orange solid. Purification by flash chromatography ([7:3] pet. ether/ethyl acetate) afforded the title compound as a white solid (2.33 g, 9.74 mmol, 65%). mp 139-141 °C.  $\nu_{\max}$  (KBr) 3028, 1737 (C=O), 1598, 1359 (NSO<sub>2</sub>), 1238, 1217, 1169 (NSO<sub>2</sub>), 1121, 957, 662, 596, 558 cm<sup>-1</sup>.  $\delta_{\text{H}}$  (500MHz, CDCl<sub>3</sub>) 2.06 (2H, t, J = 8 Hz, 4-*H*<sub>2</sub>), 2.39-2.47 (5H, m, 4'-*CH*<sub>3</sub>, 3-*H*<sub>2</sub>), 3.88 (2H, t, J = 7 Hz, 5-*H*<sub>2</sub>), 7.33 (2H, d, J = 8 Hz, 3'-*H*, 5'-*H*), 7.91 (2H, d, J = 8 Hz, 2'-*H*, 6'-*H*).  $\delta_{\text{C}}$  (125MHz, CDCl<sub>3</sub>) 18.4 (C-4), 21.2 (4'-*CH*<sub>3</sub>), 32.5 (C-3), 47.5 (C-5), 128.3 (C-2'),

129.9 (C-3'), 135.3 (C-1'), 145.5 (C-4'), 173.7 (CO).  $m/z$  (ES<sup>+</sup>) 240 (MH<sup>+</sup>). HRMS (ES) found MH<sup>+</sup> 240.0691, C<sub>11</sub>H<sub>14</sub>NO<sub>3</sub>S requires M<sup>+</sup> 240.0689, found MNa<sup>+</sup> 262.0509, C<sub>11</sub>H<sub>13</sub>NO<sub>3</sub>SNa requires M<sup>+</sup> 262.0508.

*N*-[(4'-methylphenyl)sulfonyl]piperidin-2-one **4c**

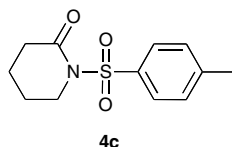

Crude material collected as a colourless oil which solidified on standing. Purification by flash chromatography ([7:3] pet. ether/ethyl acetate) afforded the title compound as a white solid (2.02 g, 7.9 mmol, 33%). mp 136-138 °C. Found; C, 56.87; H, 5.97; N, 5.37%; Calc. for C<sub>12</sub>H<sub>15</sub>NO<sub>3</sub>S; C, 56.90; H, 5.97; N, 5.53%.  $\nu_{\max}$  (KBr) 2958, 1691 (C=O), 1457, 1354 (NSO<sub>2</sub>), 1283, 1171 (NSO<sub>2</sub>), 1089, 969, 830, 577, 549 cm<sup>-1</sup>.  $\delta_{\text{H}}$  (400MHz, CDCl<sub>3</sub>) 1.74 (2H, quintet, J = 6 Hz, 4-H<sub>2</sub>), 1.87 (2H, quintet, J = 6 Hz, 5-H<sub>2</sub>), 2.28-2.48 (5H, m, 3-H<sub>2</sub>, 4'-CH<sub>3</sub>), 3.88 (2H, t, J = 6 Hz, 6-H<sub>2</sub>), 7.28 (2H, d, J = 8 Hz, 3'-H, 5'-H), 7.87 (2H, d, J = 8 Hz, 2'-H, 6'-H).  $\delta_{\text{C}}$  (100MHz, CDCl<sub>3</sub>) 20.6 (C-4), 21.9 (4'-CH<sub>3</sub>), 23.5 (C-5), 34.3 (C-3), 47.2 (C-6), 128.9 (C-2'), 129.5 (C-3'), 136.3 (C-1'), 145.0 (C-4'), 170.5 (CO).  $m/z$  (ES<sup>+</sup>) 254.1 (MH<sup>+</sup>), 276.1 (MNa<sup>+</sup>), 308.1 (MNaMeOH<sup>+</sup>), 529 (2MNa<sup>+</sup>). HRMS (ES) found MH<sup>+</sup> 254.0847, C<sub>12</sub>H<sub>16</sub>NO<sub>3</sub>S requires M<sup>+</sup> 254.0845, found MNa<sup>+</sup> 276.0666, C<sub>12</sub>H<sub>15</sub>NO<sub>3</sub>SNa requires M<sup>+</sup> 276.0665.

*N*-[(4'-methylphenyl)sulfonyl]-2-oxoazocine **4d**

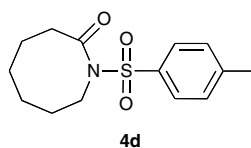

Crude material collected as a brown solid. Purification by flash chromatography ([7:3] pet. ether/ethyl acetate) afforded the title compound as a white solid (3.46 g, 12.30 mmol, 80%). mp 116-118 °C. Found; C, 59.64; H, 6.82; N, 4.79%; Calc. for C<sub>14</sub>H<sub>19</sub>NO<sub>3</sub>S; C, 59.76; H, 6.81; N, 4.98%.  $\nu_{\max}$  (KBr) 2938, 1687 (C=O), 1448, 1358 (NSO<sub>2</sub>), 1211, 1167 (NSO<sub>2</sub>), 1119, 1083, 814, 683, 634, 542 cm<sup>-1</sup>.  $\delta_{\text{H}}$  (500MHz, CDCl<sub>3</sub>) 1.46 (2H, qt, J = 6 Hz, 6-H<sub>2</sub>), 1.54 (2H, qt, J = 6 Hz, 5-H<sub>2</sub>), 1.75 (2H, qt, J = 6 Hz, 4-H<sub>2</sub>), 1.87 (2H, qt, J = 6 Hz, 7-H<sub>2</sub>), 2.41 (3H, s, 4'-CH<sub>3</sub>), 2.48 (2H, m, 3-H<sub>2</sub>), 4.06 (2H, t, J = 6 Hz, 8-H<sub>2</sub>), 7.28 (2H, d, J = 9 Hz, 3'-H, 5'-H), 7.90 (2H, d, J = 9 Hz, 2'-H, 6'-H).  $\delta_{\text{C}}$  (125MHz, CDCl<sub>3</sub>) 21.9 (4'-CH<sub>3</sub>), 23.9 (C-6), 26.3 (C-5), 28.7 (C-4), 31.3

(C-7), 36.6 (C-3), 46.3 (C-8), 129.2, 129.4 (C-2', C-3'), 136.6 (C-1'), 144.8 (C-4'), 175.1 (CO).  $m/z$  (ES<sup>+</sup>) 282.1 (MH<sup>+</sup>).

*N*-(1'-Naphthylsulfonyl)-2-oxoazepane **4e**

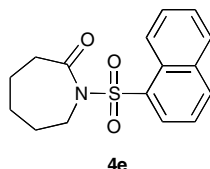

Crude material collected as a brown solid. Purification by flash chromatography ([7:3] pet. ether/ethyl acetate) afforded the title compound as a white solid (1.46 g, 4.81 mmol, 49%). mp 132-134 °C. Found; C, 63.10; H, 5.61; N, 4.42%; Calc. for C<sub>16</sub>H<sub>17</sub>NO<sub>3</sub>S; C, 63.34; H, 5.65; N, 4.62%.  $\nu_{\max}$  (KBr) 3028, 2944, 1699 (C=O), 1510, 1354 (NSO<sub>2</sub>), 1210, 1165 (NSO<sub>2</sub>), 1134, 880, 690, 506 cm<sup>-1</sup>.  $\delta_{\text{H}}$  (500MHz, CDCl<sub>3</sub>) 1.71 (2H, qt, J = 6 Hz, 4-*H*<sub>2</sub>), 1.77 (2H, qt, J = 6 Hz, 5-*H*<sub>2</sub>), 1.98 (2H, qt, J = 6 Hz, 6-*H*<sub>2</sub>), 2.47 (2H, m, 3-*H*<sub>2</sub>), 4.26 (2H, m, 7-*H*<sub>2</sub>), 7.59 (1H, t, J = 8 Hz, 6'-*H*), 7.62 (1H, t, J = 8 Hz, 3'-*H*), 7.66 (1H, t, J = 8 Hz, 7'-*H*), 7.95 (1H, d, J = 9 Hz, 5'-*H*), 8.10 (1H, d, J = 9 Hz, 4'-*H*), 8.35 (1H, d, J = 9 Hz, 8'-*H*), 8.53 (1H, d, J = 8 Hz, 2'-*H*).  $\delta_{\text{C}}$  (125MHz, CDCl<sub>3</sub>) 23.2 (C-4), 29.5 (C-5), 29.7 (C-6), 39.0 (C-3), 46.3 (C-7), 123.7 (C-8'), 124.5 (C-3'), 126.9 (C-6'), 128.4 (C-8''), 128.5 (C-7'), 129.6 (C-5'), 133.1 (C-2'), 134.3 (C-4''), 134.8 (C-1'), 135.3 (C-4'), 175.1 (CO).  $m/z$  (ES<sup>+</sup>) 304.1 (MH<sup>+</sup>).

*N*-([4'-Bromophenyl]sulfonyl)-2-oxoazepane **4f**

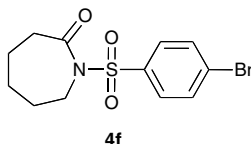

Purification on the Horizon automated chromatography system (1. 15 %, 2. 30 % ethyl acetate/cyclohexane) afforded the desired product as a white solid (1.43 g, 4.30 mmol, 49 %). mp 111-113 °C.  $\nu_{\max}$  (KBr) 2931, 2857, 1691 (NC=O), 1574, 1469, 1389, 1338 (SO<sub>2</sub>), 1161 (SO<sub>2</sub>), 1117, 1084, 1069, 1010, 960, 881, 820, 769, 743 (C-Br), 703 cm<sup>-1</sup>.  $\delta_{\text{H}}$  (400MHz, CDCl<sub>3</sub>) 1.63-1.76 (4H, m, 4-*H*<sub>2</sub>, 5-*H*<sub>2</sub>), 1.76-1.84 (2H, m, 6-*H*<sub>2</sub>), 2.52 (2H, m, 3-*H*<sub>2</sub>), 3.99 (2H, m, 7-*H*<sub>2</sub>), 7.62 (2H, d, J = 9 Hz, 3'-*H*, 5'-*H*), 7.84 (2H, d, J = 9 Hz, 2'-*H*, 6'-*H*).  $\delta_{\text{C}}$  (100MHz, CDCl<sub>3</sub>) 22.9 (C-4), 28.9 (C-5), 29.6 (C-6), 38.9 (C-3), 46.9 (C-7), 128.6 (C-4'), 130.1 (C-2'), 131.9 (C-3'), 138.7 (C-1'), 175.0 (C-2).  $m/z$  (ES<sup>+</sup>) 332.2 (MH[Br<sup>79</sup>]<sup>+</sup>), 334.2 (MH[Br<sup>81</sup>]<sup>+</sup>). HRMS (ES) found MH<sup>+</sup> 331.9953, C<sub>12</sub>H<sub>15</sub>NO<sub>3</sub>SBr<sup>79</sup> requires M<sup>+</sup> 331.9951.

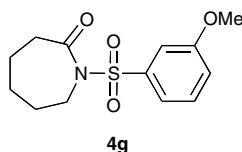

***N*-([3'-Methoxyphenyl]sulfonyl)-2-oxoazepane **4g****

Purification on the Horizon automated chromatography system (1. 15 %, 2. 30 % ethyl acetate/cyclohexane) afforded the desired product as a clear oil. (1.16 g, 4.11 mmol, 46 %).  $\nu_{\max}$  (KBr) 2942, 2863, 1698 (NC=O), 1599, 1484, 1465, 1435, 1354 (SO<sub>2</sub>), 1254, 1167 (SO<sub>2</sub>), 1122, 1090, 1078, 1037, 577, 517 cm<sup>-1</sup>.  $\delta_{\text{H}}$  (400MHz, CDCl<sub>3</sub>) 1.64-1.79 (4H, m, 4-*H*<sub>2</sub>, 5-*H*<sub>2</sub>), 1.85 (2H, m, 6-*H*<sub>2</sub>), 2.55 (2H, m, 3-*H*<sub>2</sub>), 3.86 (3H, s, OCH<sub>3</sub>), 4.01 (2H, m, 7-*H*<sub>2</sub>), 7.12 (1H, ddd,  $J_1 = 8$  Hz,  $J_2 = 3$  Hz,  $J_3 = 1$  Hz, 4'-*H*), 7.40 (1H, t,  $J = 8$  Hz, 5'-*H*), 7.53 (2H, m, 2'-*H*, 6'-*H*).  $\delta_{\text{C}}$  (100MHz, CDCl<sub>3</sub>) 23.2 (C-4), 29.4 (C-5), 29.6 (C-6), 39.0 (C-3), 46.8 (C-7), 55.9 (OCH<sub>3</sub>), 113.5 (ArCH), 120.2 (C-4'), 120.4 (ArCH), 129.9 (C-5'), 140.9 (C-1'), 159.6 (C-3'), 175.1 (C-2).  $m/z$  (ES<sup>+</sup>) 284.2 (MH<sup>+</sup>), 306.2 (MNa<sup>+</sup>), 589.3 (2MNa<sup>+</sup>). HRMS (ES) found MH<sup>+</sup> 284.0953, C<sub>13</sub>H<sub>19</sub>NO<sub>4</sub>S requires M<sup>+</sup> 284.0951.

***N*-([3'-Nitrophenyl]sulfonyl)-2-oxoazepane **4h****

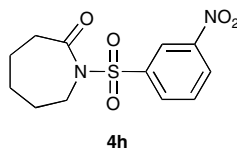

Purification on the Horizon automated chromatography system (1. 30 %, 2. 50 % ethyl acetate/cyclohexane) afforded the desired product as a white solid (0.20 g, 0.66 mmol, 15 %). mp 126-128 °C. Found; C, 48.28; H, 4.78; N, 9.31%; Calc. for C<sub>12</sub>H<sub>14</sub>N<sub>2</sub>O<sub>5</sub>S; C, 48.31; H, 4.73; N, 9.39%.  $\nu_{\max}$  (KBr) 2958, 2872, 1700 (NC=O), 1607, 1537, 1463, 1353 (SO<sub>2</sub>), 1179 (SO<sub>2</sub>), 1123, 1080 cm<sup>-1</sup>.  $\delta_{\text{H}}$  (400MHz, CDCl<sub>3</sub>) 1.66-1.81 (4H, m, 4-*H*<sub>2</sub>, 5-*H*<sub>2</sub>), 1.81-1.90 (2H, m, 6-*H*<sub>2</sub>), 2.55 (2H, m, 3-*H*<sub>2</sub>), 4.06 (2H, m, 7-*H*<sub>2</sub>), 7.35 (1H, t,  $J = 8$  Hz, 5'-*H*), 8.34 (1H, d,  $J = 8$  Hz, 6'-*H*), 8.43 (1H, d,  $J = 8$  Hz, 4'-*H*), 8.75 (1H, s, 2'-*H*).  $\delta_{\text{C}}$  (100MHz, CDCl<sub>3</sub>) 23.2 (C-4), 29.5 (C-5), 29.9 (C-6), 39.0 (C-3), 46.2 (C-7), 124.0 (C-2'), 128.3 (C-4'/6'), 130.4 (C-5'), 134.8 (C-4'/6'), 142.0 (C-1'), 148.3 (C-3'), 175.5 (C-2).  $m/z$  (ES<sup>+</sup>) 299.2 (MH<sup>+</sup>), 316.2 (MH<sub>2</sub>O<sup>+</sup>), 614.2 (2MH<sub>2</sub>O<sup>+</sup>).

**General method for cyclisation of N-alkylsulfonyl protected lactams.**

To a cold solution (0.08 M, -78 °C) of N-sulfonyl lactam (1 eq) and TMEDA (1.3 eq) in dry THF was added a cold solution of LDA (1.3 eq) via cannula. The resulting reaction mixture was stirred at -78 °C for 2 h after which time a cold (0.2 M, -78 °C) solution of diphenylphosphonic chloride (1.2 eq) in dry THF was added via cannula. The reaction mixture was stirred at -78 °C for 1 h then warmed to room temperature and quenched with  $\text{NH}_4\text{Cl}_{(\text{aq})}$ . The mixture was concentrated in vacuo and the aqueous layer extracted with ethyl acetate. The organic phase was washed with  $\text{NaHCO}_3_{(\text{aq})}$  then brine, dried over  $\text{MgSO}_4$  and concentrated in vacuo affording crude material.

**1,2,3,4,5-Quintahydro-8-methylazocine[1,2-b][1,2]benzothiazole-11,11-dioxide 5d**

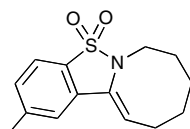

5d

Purification on a Horizon® column chromatography system (1. 20% ethyl acetate/pet. ether, 2. 40% ethyl acetate/pet. ether) afforded the title compound as a clear oil (0.09 g, 0.34 mmol, 18%) and phosphonite (0.21 g, 0.44 mmol, 25%).  $\nu_{\text{max}}$  (KBr) 2925, 2854, 1651, 1601, 1455, 1289, 1171, 1142, 1050, 1016, 896, 819, 802  $\text{cm}^{-1}$ .  $\delta_{\text{H}}$  (400MHz,  $\text{CDCl}_3$ ) 1.71 (2H, m, 3- $H_2$ ), 1.79 (2H, m, 4- $H_2$ ), 2.02 (2H, quint,  $J = 7$  Hz, 2- $H_2$ ), 2.46 (3H, s, 8- $\text{CH}_3$ ), 2.59 (2H, m,  $J = 7$  Hz, 5- $H_2$ ), 4.02 (2H, t,  $J = 7$  Hz, 1- $H_2$ ), 5.55 (1H, t,  $J = 9$  Hz, 6- $H$ ), 7.30 (1H, d,  $J = 8$  Hz, 8- $H$ ), 7.44 (1H, s, 7- $H$ ), 7.67 (1H, d,  $J = 8$  Hz, 9- $H$ ).  $\delta_{\text{C}}$  (100MHz,  $\text{CDCl}_3$ ) 22.3 (8- $\text{CH}_3$ ), 22.5 (C-3), 23.6 (C-5), 28.6 (C-4), 30.5 (C-2), 40.3 (C-1), 100.6 (C-6), 120.9 (C-7), 121.1 (C-10), 128.9 (C-10a), 130.6 (C-9), 132.1 (C-6b), 134.0 (C-6a), 143.9 (C-8).  $m/z$  ( $\text{ES}^+$ ) 264.1 ( $\text{MH}^+$ ), 286.1 ( $\text{MNa}^+$ ), 318.1 ( $\text{MMeOHNa}^+$ ), 549.3 ( $2\text{MNa}^+$ ). HRMS (ES) found  $\text{MH}^+$  264.1052,  $\text{C}_{14}\text{H}_{18}\text{NO}_2\text{S}$  requires  $\text{M}^+$  264.1053.

**1,2,3,4-Tetrahydroazepino[1,2-b][1,2]naphthathiazole-12,12-dioxide 5e**

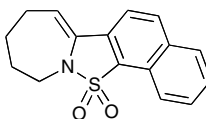

5e

Purification on the Horizon column chromatography system (20% ethyl acetate/pet. ether) afforded the title compound as a white solid (0.35 g, 1.23 mmol, 26%), recovered starting material (41%) and phosphonite (0.17 g, 0.34 mmol, 17%). mp 183-186 °C.  $\nu_{\max}$  (KBr) 2930, 2868, 1657, 1626, 1592, 1512, 1288, 1154, 1131, 1074, 1005, 936, 826, 807, 761.  $\delta_{\text{H}}$  (500MHz, CDCl<sub>3</sub>) 1.83 (2H, quint, J = 6 Hz, 3-*H*<sub>2</sub>), 2.05 (2H, m, 2-*H*<sub>2</sub>), 2.50 (2H, q, J = 6 Hz, 4-*H*<sub>2</sub>), 3.67 (2H, m, 1-*H*<sub>2</sub>), 5.93 (1H, t, J = 6 Hz, 5-*H*), 7.57-7.63 (2H, m, 6-*H*, 9-*H*), 7.70 (1H, t, J = 8 Hz, 10-*H*), 7.91 (1H, d, J = 8 Hz, 8-*H*), 7.98 (1H, d, J = 9 Hz, 7-*H*), 8.37 (1H, d, J = 9 Hz, 11-*H*).  $\delta_{\text{C}}$  (125MHz, CDCl<sub>3</sub>) 27.0 (C-3), 27.6 (C-4), 29.0 (C-2), 45.5 (C-1), 108.5 (C-5), 117.3 (ArCH), 123.5 (C-11), 125.5 (C-11a), 126.2 (C-11b), 127.9 (ArCH), 128.9 (C-8), 129.4 (C-10), 131.2 (C-5b), 133.5 (C-7a), 134.0 (C-7), 136.5 (C-5a). *m/z* (ES<sup>+</sup>) 286.1 (MH<sup>+</sup>), 308.1 (MNa<sup>+</sup>), 340.1 (MMeOHNa<sup>+</sup>), 593.3 (2MNa<sup>+</sup>), 878.4 (3MNa<sup>+</sup>). HRMS (ES) found MH<sup>+</sup> 286.0899, C<sub>16</sub>H<sub>16</sub>NO<sub>2</sub>S requires 286.0896.

**1,2,3,4-Tetrahydro-6/8-methoxyazepino[1,2-b][1,2]benzothiazole-10,10-dioxide 5g**

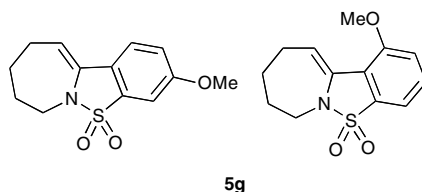

The crude material was collected as a pale brown oil which was purified by flash chromatography (1. 10% EtOAc/Pet. ether, 2. 15% EtOAc/Pet. ether, 3. 50% EtOAc/Pet. ether) affording a mixture of isomers and phosphonite. The initial fraction provided **1,2,3,4-Tetrahydro-6-methoxyazepino[1,2-b][1,2]benzothiazole-10,10-dioxide** as a colourless oil. (0.067 g, 0.25 mmol, 25%).  $\nu_{\max}$  (KBr) 2941, 1647, 1595, 1485, 1440, 1304, 1273, 1212, 1171, 1158, 1044. cm<sup>-1</sup>.  $\delta_{\text{H}}$  (400MHz, CDCl<sub>3</sub>) 1.81 (2H, quint, J = 6 Hz, 3-*H*<sub>2</sub>), 1.95 (2H, quint, J = 6 Hz, 2-*H*<sub>2</sub>), 2.44 (2H, q, J = 6 Hz, 4-*H*<sub>2</sub>), 3.59 (2H, m, 1-*H*<sub>2</sub>), 3.95 (3H, s, OCH<sub>3</sub>), 6.52 (1H, t, J = 6 Hz, 5-*H*), 7.08 (1H, m, ArCH), 7.34-7.44 (2H, m, 8-*CH*, ArCH).  $\delta_{\text{C}}$  (100MHz, CDCl<sub>3</sub>) 26.2 (C-3), 27.2 (C-4), 29.2 (C-2), 45.5 (C-1), 56.1 (OCH<sub>3</sub>), 113.2 (ArC), 114.5 (C-5), 114.7 (ArC), 120.0 (C-5b), 130.5 (C-8), 133.8 (C-9a), 135.9 (C-5a), 155.7 (C-6). *m/z* (ES<sup>+</sup>) 266.2 (MH<sup>+</sup>). HRMS (ES) found MH<sup>+</sup> 266.08454, C<sub>13</sub>H<sub>16</sub>NO<sub>3</sub>S requires M<sup>+</sup> 266.08483. Further elution then afforded **1,2,3,4-Tetrahydro-8-methoxyazepino[1,2-b][1,2]benzothiazole-10,10-dioxide** as a colourless oil. (0.017 g, 0.06 mmol, 6%).  $\nu_{\max}$  (KBr) 2941, 1664, 1611, 1495, 1464, 1441, 1303, 1274, 1168, 1056, 1027 cm<sup>-1</sup>.  $\delta_{\text{H}}$  (400MHz, CDCl<sub>3</sub>) 1.80 (2H, quint, J = 6 Hz, 3-*H*<sub>2</sub>), 1.98 (2H, m, 2-*H*<sub>2</sub>), 2.42 (2H, q, J = 6 Hz, 4-*H*<sub>2</sub>), 3.59 (2H, m, 1-*H*<sub>2</sub>), 5.65 (1H, t, J = 6 Hz, 5-*H*), 7.13 (1H, m, 7-*H*), 7.19 (1H, s, 9-*H*), 7.50

(1H, d, J = 9 Hz, 6-H).  $\delta_C$  (100MHz, CDCl<sub>3</sub>) 27.1, 27.2 (C-4, C-3), 28.9 (C-2), 45.4 (C-1), 56.1 (OCH<sub>3</sub>), 103.3 (C-9), 104.9 (C-5), 122.0 (C-6), 122.3 (C-7), 124.9 (C-5b), 132.4 (C-9a), 135.7 (C-5a), 160.9 (C-8). *m/z* (ES<sup>+</sup>) 266.2 (MH<sup>+</sup>). HRMS (ES) found MH<sup>+</sup> 266.08480, C<sub>13</sub>H<sub>16</sub>NO<sub>3</sub>S requires M<sup>+</sup> 266.08454.

**1-Tosyl-4,5,6,7,8-quintahydro-1H-azepin-2-yl diphenylphosphinate 8d**

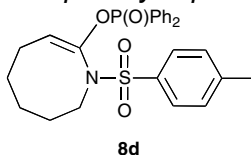

mp 199-200 °C. HPLC r.t. = 6.02 min, 98.13%.  $\nu_{\max}$  (KBr) 2928, 2851, 1671, 1593, 1440, 1348, 1235, 1156, 1126, 1076, 1006, 961, 874, 829, 730 cm<sup>-1</sup>.  $\delta_H$  (400MHz, CDCl<sub>3</sub>) 1.43-1.60 (6H, m, 5-H<sub>2</sub>, 6-H<sub>2</sub>, 7-H<sub>2</sub>), 2.13 (2H, m, 4-H<sub>2</sub>), 2.36 (3H, s, 4''-CH<sub>3</sub>), 3.31 (2H, m, 8-H<sub>2</sub>), 5.54 (1H, dt, J<sub>P</sub> = 2 Hz, J<sub>H</sub> = 8 Hz, 3-H), 7.09 (2H, d, J = 8 Hz, 3''-H, 5''-H), 7.38-7.45 (4H, m, Ar-H), 7.51-7.57 (2H, m, 4'-H), 7.63-7.70 (4H, m, Ar-H), 7.73 (2H, d, J = 8 Hz, 2''-H, 6''-H).  $\delta_C$  (100MHz, CDCl<sub>3</sub>) 21.9 (4''-CH<sub>3</sub>), 26.2 (C-4), 26.9 (C-6), 27.2 (C-7), 28.8 (C-5), 50.3 (C-8), 119.3 (C-3), 128.1 (C-2''), 128.8 (ArCH), 129.8 (C-3''), 130.5 (ArC), 132.1 (ArCH), 132.8 (C-4'), 137.7 (ArC), 138.4 (ArC), 143.6 (C-2).  $\delta_P$  (162MHz, CDCl<sub>3</sub>) 32.4. *m/z* (ES<sup>+</sup>) 482.1 (MH<sup>+</sup>), 980.4 (2MH<sub>2</sub>O<sup>+</sup>). HRMS (ES) found MH<sup>+</sup> 482.1554, C<sub>26</sub>H<sub>29</sub>N<sub>1</sub>O<sub>4</sub>S<sub>1</sub>P<sub>1</sub> requires M<sup>+</sup> 482.1550, found MNa<sup>+</sup> 504.1367, C<sub>26</sub>H<sub>28</sub>N<sub>1</sub>O<sub>4</sub>S<sub>1</sub>P<sub>1</sub>Na<sub>1</sub> requires M<sup>+</sup> 504.1369.

**1-(1''-Naphthylsulfonyl-4,5,6,7-tetrahydro-1H-azepin-2-yl diphenylphosphinate 8e**

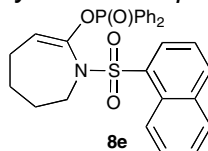

Pure material isolated as a colourless oil.  $\nu_{\max}$  (KBr) 3064, 2943, 1672, 1440, 1338, 1226, 1200, 1160, 1133, 1097, 1062, 803 cm<sup>-1</sup>.  $\delta_H$  (500MHz, CDCl<sub>3</sub>) 1.29 (2H, m, 5-H<sub>2</sub>), 1.47 (2H, quint, J = 6 Hz, 6-H<sub>2</sub>), 1.86 (2H, q, J = 7 Hz, 4-H<sub>2</sub>), 3.26 (2H, m, 7-H<sub>2</sub>), 5.64 (1H, dt, J<sub>1</sub> = 7 Hz, J<sub>2</sub> = 3 Hz, 3-H), 7.31-7.39 (5H, m, 3''-H, 3'-H, 5'-H), 7.46-7.59 (4H, m, 4'-H, 7''-H, 6''-H), 7.70 (4H, m, 2'-H, 6'-H), 7.90 (1H, d, J = 8 Hz, 5''-H), 7.98 (1H, d, J = 8 Hz, 4''-H), 8.25 (1H, m, 2''-H), 8.70 (1H, d, J = 8.5 Hz, 8''-H).  $\delta_C$  (125MHz, CDCl<sub>3</sub>) 23.9 (C-5), 24.2 (C-4), 29.9 (C-6), 49.6 (C-7), 114.1 (C-3), 124.4 (C-3''), 125.5 (C-8''), 127.4, 128.4 (C-6'', C-7''), 128.6, 128.7 (C-3'), 129.0 (C-5''), 129.6 (C-2''), 130.1, 131.2 (2 x ArC), 132.1 (ArC), 132.2 (C-2'), 132.6 (C-4'), 134.4 (C-4''), 134.5 (ArC), 136.4 (ArC), 143.6 (d, C-2).  $\delta_P$  (162MHz, CDCl<sub>3</sub>) 31.2. *m/z* (ES<sup>+</sup>) 504.1 (MH<sup>+</sup>), 526.1 (MNa<sup>+</sup>), 1029.4 (2MNa<sup>+</sup>). HRMS (ES) found MH<sup>+</sup> 504.1401, C<sub>28</sub>H<sub>27</sub>NO<sub>4</sub>PS requires M<sup>+</sup> 504.1393.

1-(3'-Methoxyphenyl)-4,5,6,7-tetrahydro-1H-azepin-2-yl diphenylphosphinate **8g**

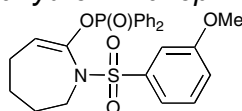

**8g**

Pure material collected as a clear oil.  $\nu_{\max}$  (KBr) 3065, 2943, 1673, 1599, 1484, 1440, 1360, 1240, 1158, 1131, 1105, 1049  $\text{cm}^{-1}$ .  $\delta_{\text{H}}$  (500MHz,  $\text{CDCl}_3$ ) 1.35 (2H, m, 5- $H_2$ ), 1.66 (2H, quint,  $J = 6$  Hz, 6- $H_2$ ), 1.87 (2H, q,  $J = 7$  Hz, 4- $H_2$ ), 3.19 (2H, m, 7- $H_2$ ), 3.67 (3H, s, 3''- $\text{OCH}_3$ ), 5.55 (1H, dt,  $J_1 = 7$  Hz,  $J_2 = 3$  Hz, 3- $H$ ), 7.00 (1H, m, Ar- $H$ ), 7.21 (1H, t,  $J = 8$  Hz, 5''- $H$ ), 7.36 (1H, m, 2''- $H$ ), 7.38-7.46 (5H, m, 3'- $H$ , 5'- $H$ , Ar- $H$ ), 7.54 (2H, m, 4'- $H$ ), 7.81 (4H, m, 2'- $H$ , 6'- $H$ ).  $\delta_{\text{C}}$  (125MHz,  $\text{CDCl}_3$ ) 23.9 (C-5), 24.3 (C-4), 30.0 (C-6), 49.5 (C-7), 55.7 ( $\text{CH}_3$ ), 111.9 (C-2''), 113.9 (C-3), 119.5, 119.7 (C-4'', C-6''), 128.7, 128.8 (C-3'), 130.2 (C-5''), 131.2 (C-1'), 132.1, 132.2 (C-2'), 132.7 (C-4'), 142.2 (C-1''), 143.6 (d, C-2), 160.0 (C-3'').  $\delta_{\text{P}}$  (162MHz,  $\text{CDCl}_3$ ) 31.4.  $m/z$  ( $\text{ES}^+$ ) 484.2 ( $\text{MH}^+$ ), 506.2 ( $\text{MNa}^+$ ), 988.8 ( $2\text{MNa}^+$ ). HRMS (ES) found  $\text{MH}^+$  484.1345,  $\text{C}_{25}\text{H}_{27}\text{NO}_5\text{PS}$  requires  $\text{M}^+$  484.1342, found  $\text{MNa}^+$  506.1165,  $\text{C}_{25}\text{H}_{26}\text{NO}_5\text{PSNa}$  requires  $\text{M}^+$  506.1162.
